# Supplementary material for: The Arp2/3 complex binding protein HS1 is required for efficient dendritic cell random migration and force generation
Source: Royal Society of Chemistry journal article supplement (doi:10.1039/c7ib00070g), 2017-07-05
Supplement: c7ib00070g5.pdf [file c7ib00070g5.pdf]

## Supplementary Materials

### The Arp 2/3 Complex Binding Protein HS1 is Required for DC Random Migration and Force Generation

Amy C. Bendell, Edward K. Williamson, Christopher S. Chen, Janis K. Burkhardt, Daniel A. Hammer

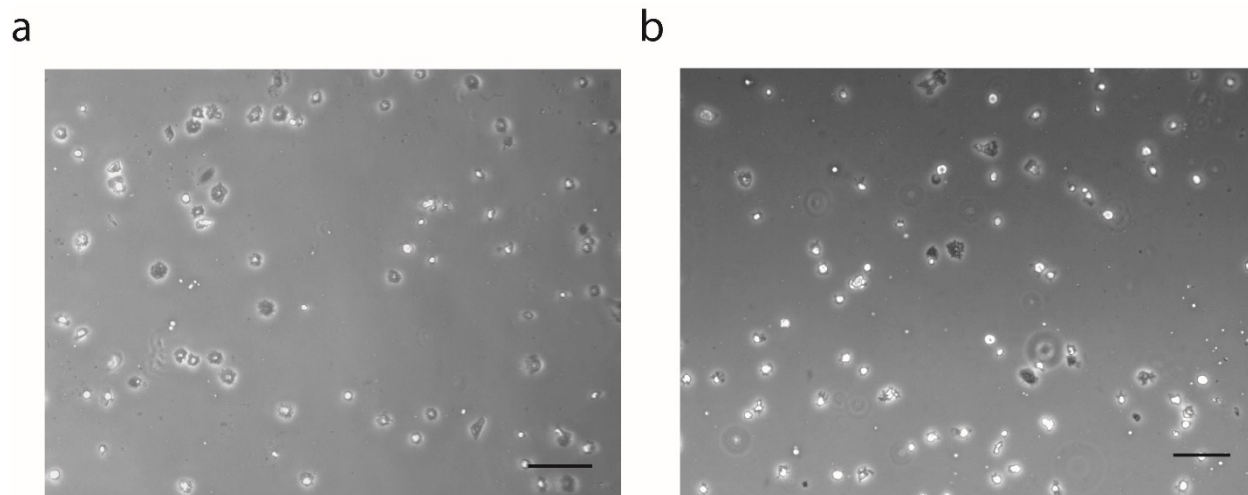

**Supplementary Figure 1.** HS1<sup>-/-</sup> DCs are morphologically similar to WT DCs. Phase contrast images of WT DCs (a) and HS1<sup>-/-</sup> DCs (b). Images are snapshots from longer, time course experiments. Cells are plated on 10  $\mu$ g/mL fibronectin and are migrating in the presence of 10 nM CCL19. Scale bar represents 100  $\mu$ m.

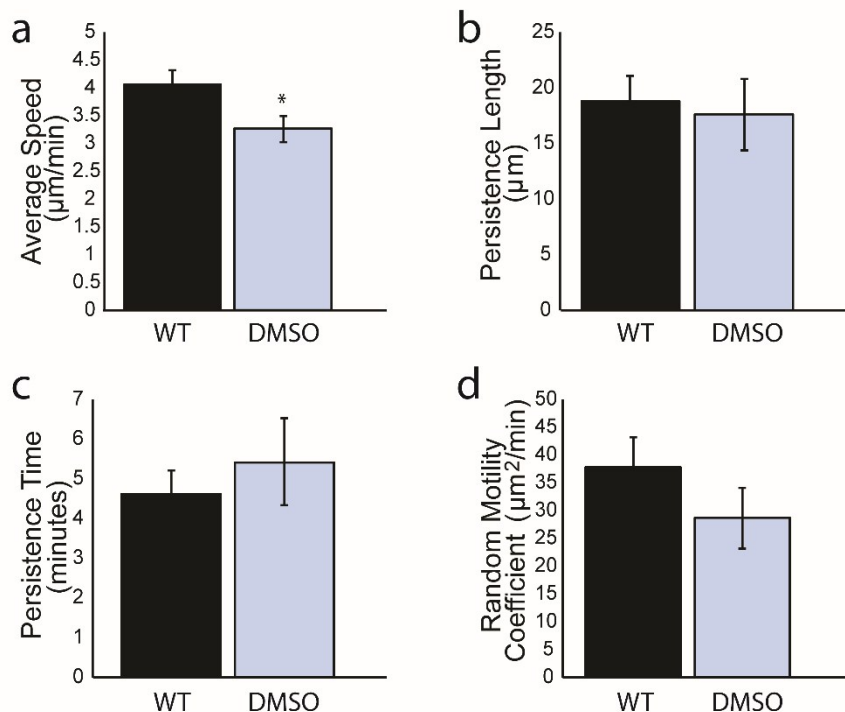

**Supplementary Figure 2.** Quantification of WT DC chemokinesis in the presence of DMSO (a) average speed, (b) persistence length and (c) persistence time, (d) random motility coefficient. Figures represent average values  $\pm$  SEM, for  $> 675$  DCs from at least three independent experiments per condition. Statistical significance calculated with single factor ANOVA and post hoc Tukey test. Indicates significant difference compared to WT DCs. \* $p<0.05$ , \*\* $p<0.01$

**Supplementary Video 1.** Phase contrast video of WT DC Chemokinesis. Cells are plated on  $10\text{ }\mu\text{g/mL}$  fibronectin and are migrating in the presence of  $10\text{ nM}$  CCL19.

**Supplementary Video 2.** Phase contrast video of HS1<sup>-/-</sup> DC Chemokinesis. Cells are plated on  $10\text{ }\mu\text{g/mL}$  fibronectin and are migrating in the presence of  $10\text{ nM}$  CCL19.

**Supplementary Video 3.** Fluorescent video of GFP Life-act DCs. Filopodia and lamellipodia form at the leading edge and are relatively stable. Cells are plated on  $10\text{ }\mu\text{g/mL}$  fibronectin and are migrating in the presence of  $10\text{ nM}$  CCL19.

**Supplementary Video 4.** Fluorescent video of HS1<sup>-/-</sup> DCs transduced with GFP Life-act. Stable lamellipodia fail to form at the leading edge and dynamic membrane ruffling is observed. Cells are plated on  $10\text{ }\mu\text{g/mL}$  fibronectin and are migrating in the presence of  $10\text{ nM}$  CCL19.
